# Supplementary material
Source: HighWire-hosted journal article supplement (https://srh.bmj.com/content/45/2/159)
Supplement: inline-supplementary-material-1 [file inline-supplementary-material-1.docx]

**Appendix C**

**Focus Groups Questions**

1. Have you faced any difficulties in accessing sexual and reproductive health services?
2. If yes, What caused such difficulties?
3. How did they affect you?
4. What could help you to overcome such difficulties?
5. What type of contraception do you use? Or have used in the past?
6. How did you make this choice and were you supported in this choice?
7. Did you have a free choice in the method of contraception?
8. Did you ever face an unintended pregnancy?
9. If yes: how many times? _______ and why was it unintended at that time?
10. What led to the occurrence of an unintended pregnancy?
11. What could have prevented this to happen?
12. Has that pregnancy any effect on the family dynamics, your relationship with your husband and other family members.
13. Did you try to terminate this pregnancy? If yes, why was that? What did you use?
14. Any other issues you want to raise?
